# Supplementary material for: Combined Autophagy Inhibition and Dendritic Cell Recruitment Induces Antitumor Immunity and Enhances Immune Checkpoint Blockade Sensitivity in Pancreatic Cancer
Source: PubMed Central journal article supplement — Cancer Res. 2024 Sep 17;84(24):4214–32. doi: 10.1158/0008-5472.CAN-24-0830 (PMC11647207; doi:10.1158/0008-5472.can-24-0830), 2024-09-17
Supplement: can-24-0830_figure_s1_suppsf1.pdf [file can-24-0830_figure_s1_suppsf1.pdf]

Supplementary Figure S1

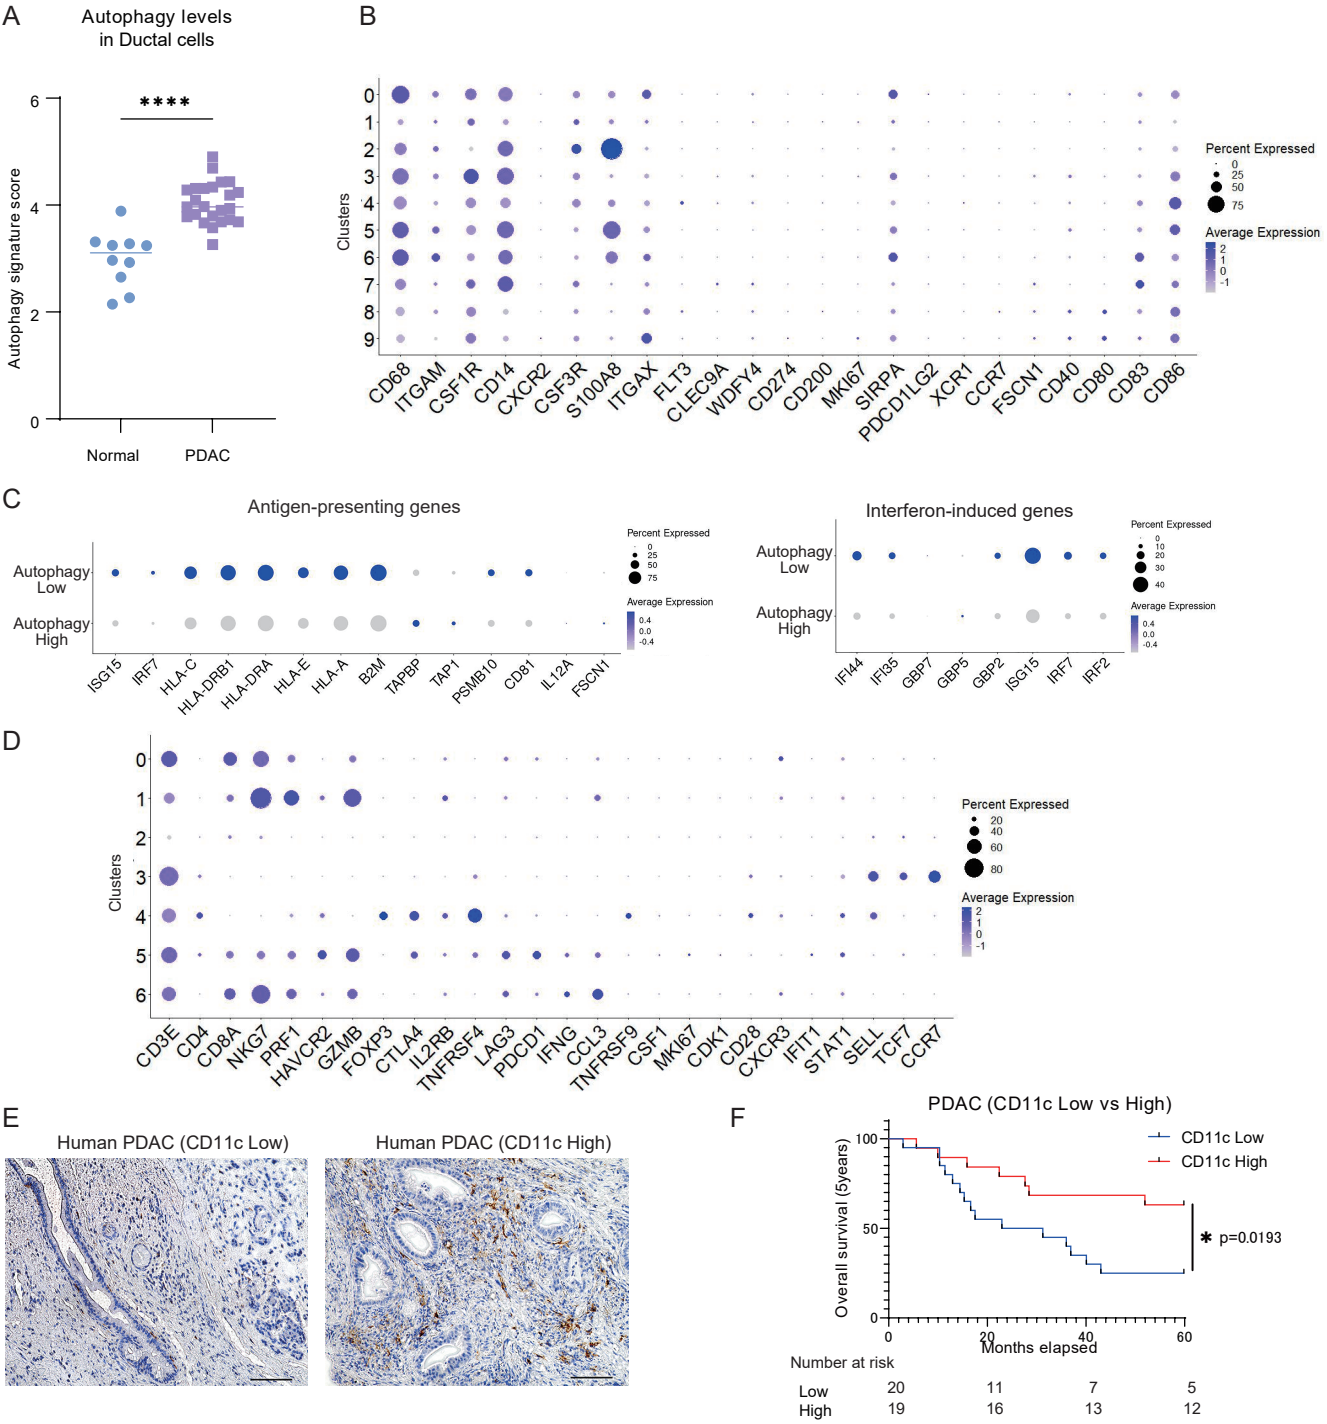

**Supplementary Fig. S1. Analysis of human PDAC tumors reveals a negative correlation between autophagy in cancer cells and DC activation**

**(A)** “Autophagy signature score” for each case. These scores were compared between the normal and PDAC groups.

**(B)** Dot plots showing the expression of key signature genes used in the identification of the specific myeloid cell clusters presented in Fig. 1B; ‘0’, ‘5’, and ‘8’ were identified as DC clusters.

**(C)** Dot plots showing the expression of key signature genes used to calculate the functional signature scores of DC clusters in Fig. 1C.

**(D)** Dot plots showing the expression of key signature genes used in the identification of each T cell clusters in Fig. 1D.

**(E, F)** Immunohistochemistry was performed to evaluate the level of CD11c expression in 39 PDAC patients. Representative images of CD11c-Low and CD11c-High PDAC tumors (E), and Kaplan-Meier overall survival analysis of PDAC patients in relation to CD11c expression (F).

Scale bars, 100  $\mu$ m (E). Bars, median; \*\*\*\* $p < 0.0001$ ; analyzed using the Student’s t-test (A).
