# Supplementary material for: Combined Autophagy Inhibition and Dendritic Cell Recruitment Induces Antitumor Immunity and Enhances Immune Checkpoint Blockade Sensitivity in Pancreatic Cancer
Source: PubMed Central journal article supplement — Cancer Res. 2024 Sep 17;84(24):4214–32. doi: 10.1158/0008-5472.CAN-24-0830 (PMC11647207; doi:10.1158/0008-5472.can-24-0830), 2024-09-17
Supplement: can-24-0830_figure_s3_suppsf3.pdf [file can-24-0830_figure_s3_suppsf3.pdf]

# Supplementary Figure S3

A

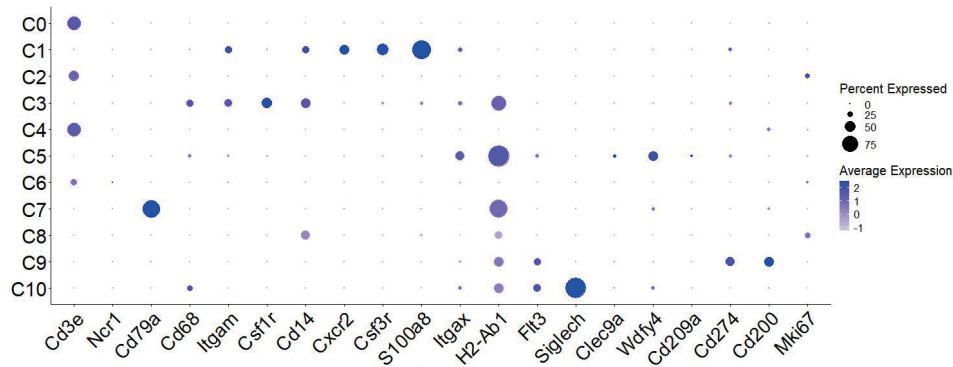

B

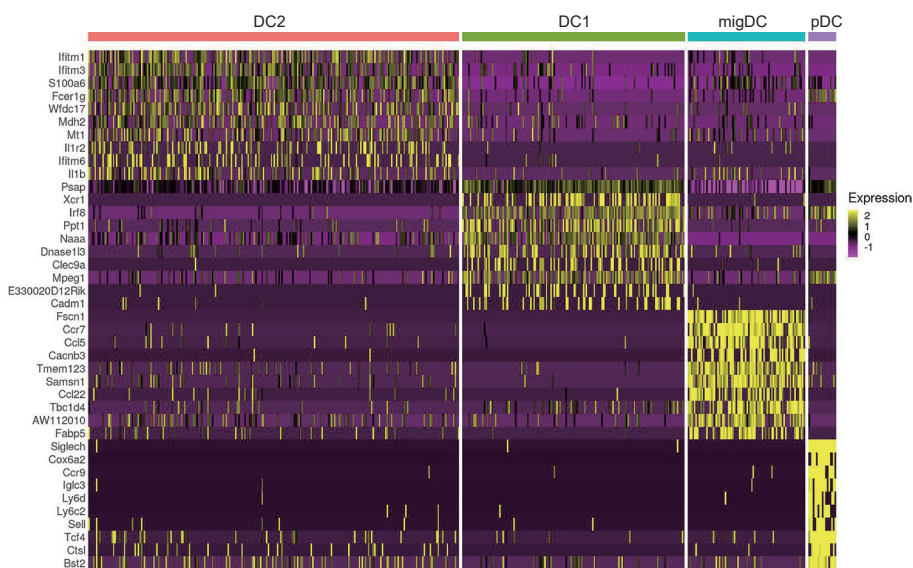

C

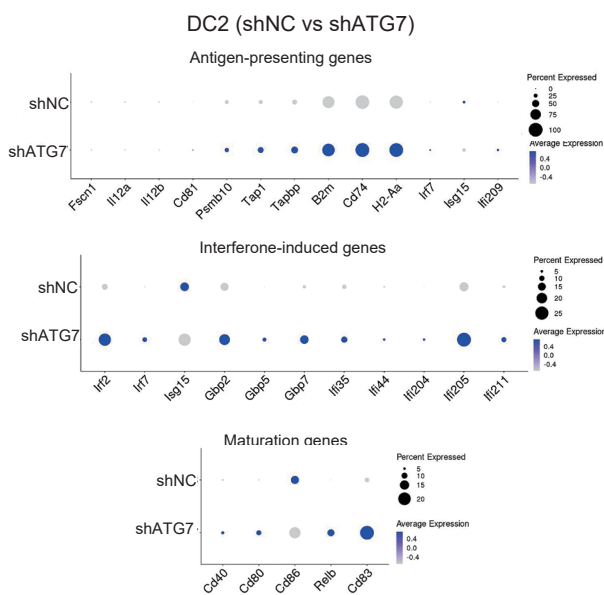

D

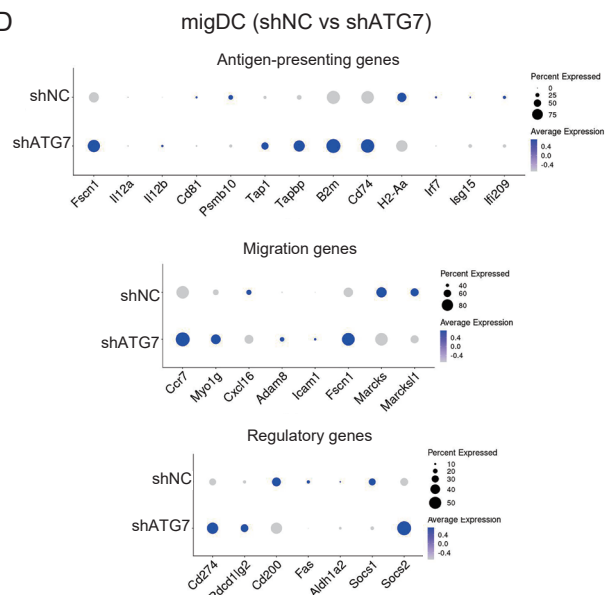

E

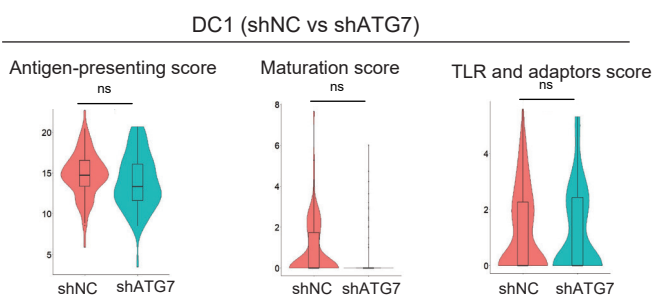

**Supplementary Fig. S3. scRNA-seq analysis of orthotopic syngeneic KPC1 shNC and shATG7 tumors**

**(A)** Dot plots showing the expression levels of well-known markers in the immune populations shown in Fig. 2C.

**(B)** Heatmap of the top 10 differentially expressed genes (DEGs) in each of the DC clusters identified in Fig. 2D.

**(C, D)** The expression levels of gene sets related to DC function were analyzed in DC2 (C) and migDC (D). The gene sets are listed in the dot-plots.

**(E)** The expression levels of gene sets related to DC function were analyzed in the DC1.

Boxplots show a centerline, median; box limits, upper and lower quartiles; whiskers that extent up to  $1.5\times$  the interquartile range beyond the upper and lower quartiles (E). ns, not significant; analyzed using the Wilcoxon rank-sum test (E).
