# Supplementary material for: Combined Autophagy Inhibition and Dendritic Cell Recruitment Induces Antitumor Immunity and Enhances Immune Checkpoint Blockade Sensitivity in Pancreatic Cancer
Source: PubMed Central journal article supplement — Cancer Res. 2024 Sep 17;84(24):4214–32. doi: 10.1158/0008-5472.CAN-24-0830 (PMC11647207; doi:10.1158/0008-5472.can-24-0830), 2024-09-17
Supplement: can-24-0830_figure_s4_suppsf4.pdf [file can-24-0830_figure_s4_suppsf4.pdf]

Supplementary Figure S4

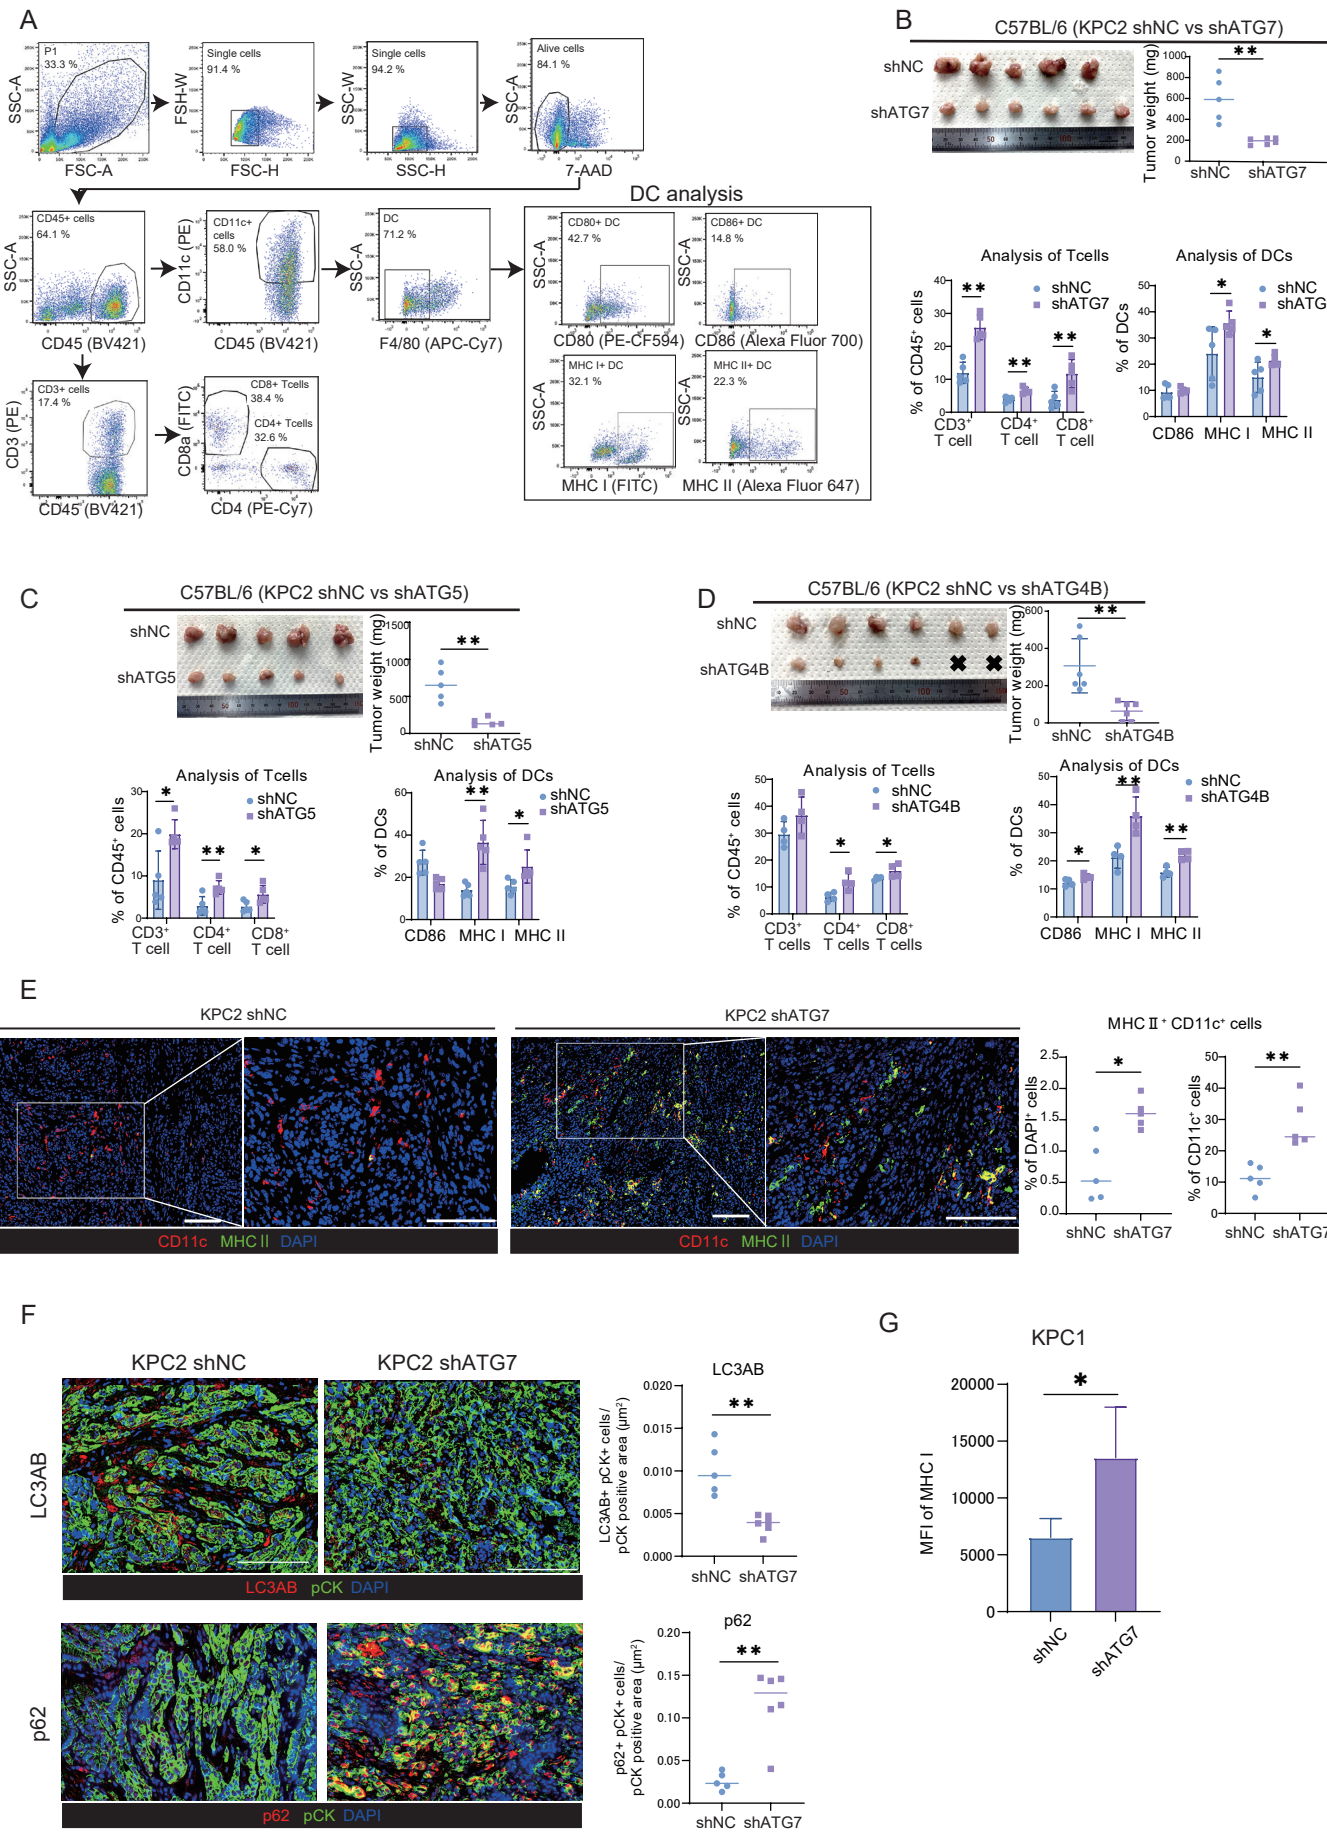

**Supplementary Fig. S4. Autophagy inhibition in cancer cells induces the activation of DCs in several murine autophagy-deficient PDAC models**

**(A)** Flow cytometry gating strategy used in the analysis of murine tumors. Representative data is shown.

**(B)** KPC2 shNC or shATG7 tumors were orthotopically transplanted into C57BL/6 mice to compare tumor growth (upper). Tumor-infiltrating immune cell populations were analyzed using flow cytometry (lower).

**(C)** KPC2 shNC or shATG5 tumors were orthotopically transplanted into C57BL/6 mice to compare tumor growth (upper). Tumor-infiltrating immune cell populations were analyzed using flow cytometry (lower).

**(D)** KPC2 shNC or shATG4B tumors were orthotopically transplanted into C57BL/6 mice to compare tumor growth (upper). Tumor-infiltrating immune cell populations were analyzed using flow cytometry (lower).

**(E)** Results from an immunofluorescence analysis of orthotopic syngeneic KPC2 shNC/shATG7 tumors (Fig. S4B), showing activated DCs expressing CD11c (red) and MHC II (green). Representative images are shown. The graphs show the proportions of MHC II<sup>+</sup> CD11c<sup>+</sup> cells/DAPI<sup>+</sup> cells (%) and MHC II<sup>+</sup> CD11c<sup>+</sup> cells/CD11c<sup>+</sup> cells (%).

**(F)** Sequential IHC analyses were performed to evaluate the colocalization of LC3AB (red) / pCK (green), or p62 (red) / pCK (green). The graphs show the number of LC3AB<sup>+</sup> pCK<sup>+</sup> cells/pCK positive area and the number of p62<sup>+</sup> pCK<sup>+</sup> cells/pCK positive area.

**(G)** The expression of MHC I of CD45 negative cells derived from orthotopic syngeneic PDAC tumors (KPC1 shNC and KPC1 shATG7) were analyzed by flow cytometry.

Scale bars, 100  $\mu$ m (E). Bars, median; Error bars, mean  $\pm$  SD; \* $p < 0.05$ , \*\* $p < 0.01$ , \*\*\* $p < 0.001$ , \*\*\*\* $p < 0.0001$ ; ns, not significant; analyzed using the Student's t-test (B–G).
