# Supplementary material for: Combined Autophagy Inhibition and Dendritic Cell Recruitment Induces Antitumor Immunity and Enhances Immune Checkpoint Blockade Sensitivity in Pancreatic Cancer
Source: PubMed Central journal article supplement — Cancer Res. 2024 Sep 17;84(24):4214–32. doi: 10.1158/0008-5472.CAN-24-0830 (PMC11647207; doi:10.1158/0008-5472.can-24-0830), 2024-09-17
Supplement: can-24-0830_figure_s5_suppsf5.pdf [file can-24-0830_figure_s5_suppsf5.pdf]

A

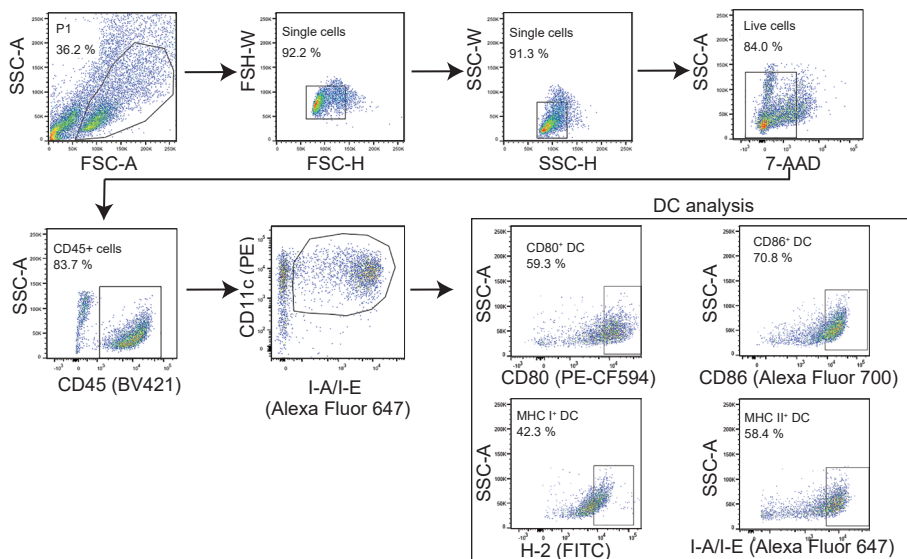

B

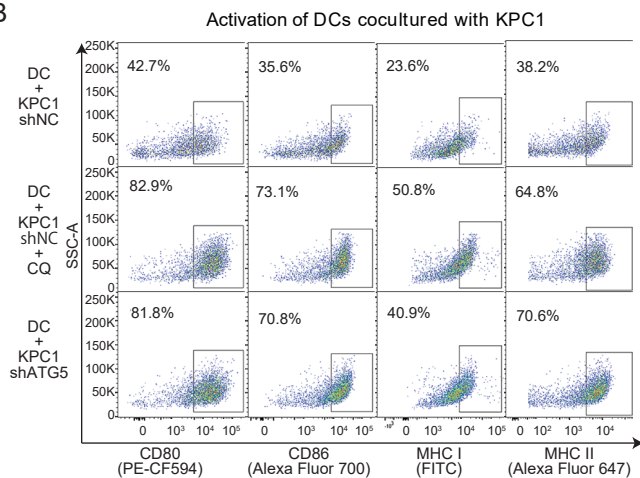

C

DCs cocultured with KPC1 (shNC/shATG5)

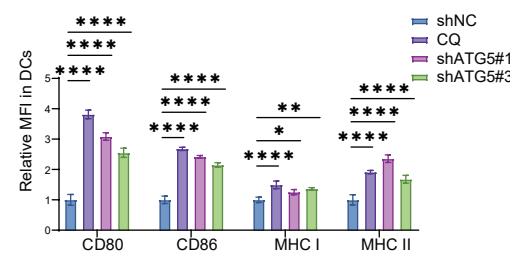

D

DCs cocultured with KPC2 (shNC/shATG5)

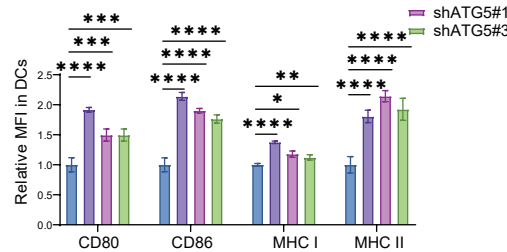

E

DCs cocultured with KPC (shNC/shATG7)

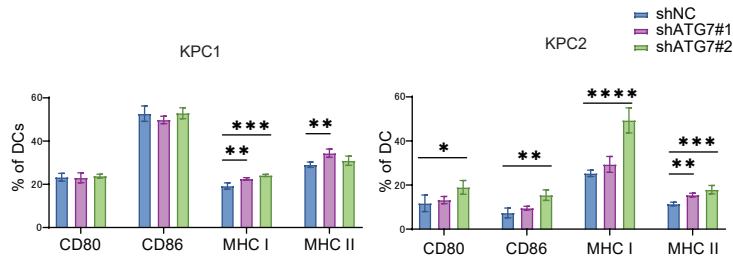

F

DCs cocultured with KPC (shNC/shATG4B)

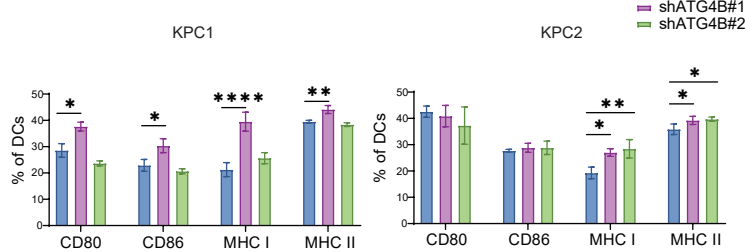

G

DC treated with CQ

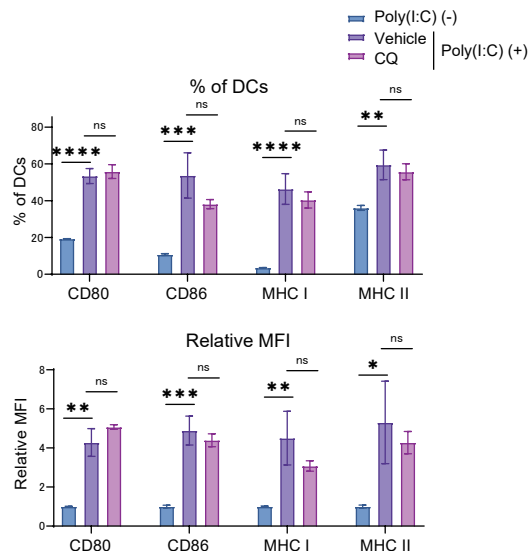

**Supplementary Fig. S5. In vitro coculture assays reveal that autophagy-deficient cancer cells directly induce DC activation**

**(A)** Flow cytometry gating strategy used in the analysis of DCs cocultured with cancer cells in vitro. Representative data are shown.

**(B)** Flow cytometry analysis of the expression of the activation and maturation markers of DCs cocultured with cancer cells. Representative dot plots in Fig.3B.

**(C, D)** Quantification of mean fluorescence intensities (MFIs) of DCs cocultured with cancer cells in Fig. 3B.

**(E)** Flow cytometry analysis of the expression of the activation and maturation markers, CD80, CD86, MHC I, and MHC II in DCs cocultured with KPC1/2 shNC or KPC1/2 shATG7#1, #2.

**(F)** Flow cytometry analysis of the expression of the activation and maturation markers, CD80, CD86, MHC I, and MHC II in DCs cocultured with KPC1/2 shNC or KPC1/2 shATG4B#1, #2.

**(G)** Flow cytometry analysis of the expression of the activation and maturation markers, CD80, CD86, MHC I, and MHC II in DCs treated with CQ under activated condition by Poly(I:C).

Error bars, mean  $\pm$  SD; \* $p < 0.05$ , \*\* $p < 0.01$ , \*\*\* $p < 0.001$ , \*\*\*\* $p < 0.0001$ ; ns, not significant; analyzed using the one-way ANOVA (C-G).
