# Supplementary material for: Combined Autophagy Inhibition and Dendritic Cell Recruitment Induces Antitumor Immunity and Enhances Immune Checkpoint Blockade Sensitivity in Pancreatic Cancer
Source: PubMed Central journal article supplement — Cancer Res. 2024 Sep 17;84(24):4214–32. doi: 10.1158/0008-5472.CAN-24-0830 (PMC11647207; doi:10.1158/0008-5472.can-24-0830), 2024-09-17
Supplement: can-24-0830_figure_s6_suppsf6.pdf [file can-24-0830_figure_s6_suppsf6.pdf]

Supplementary Figure S6

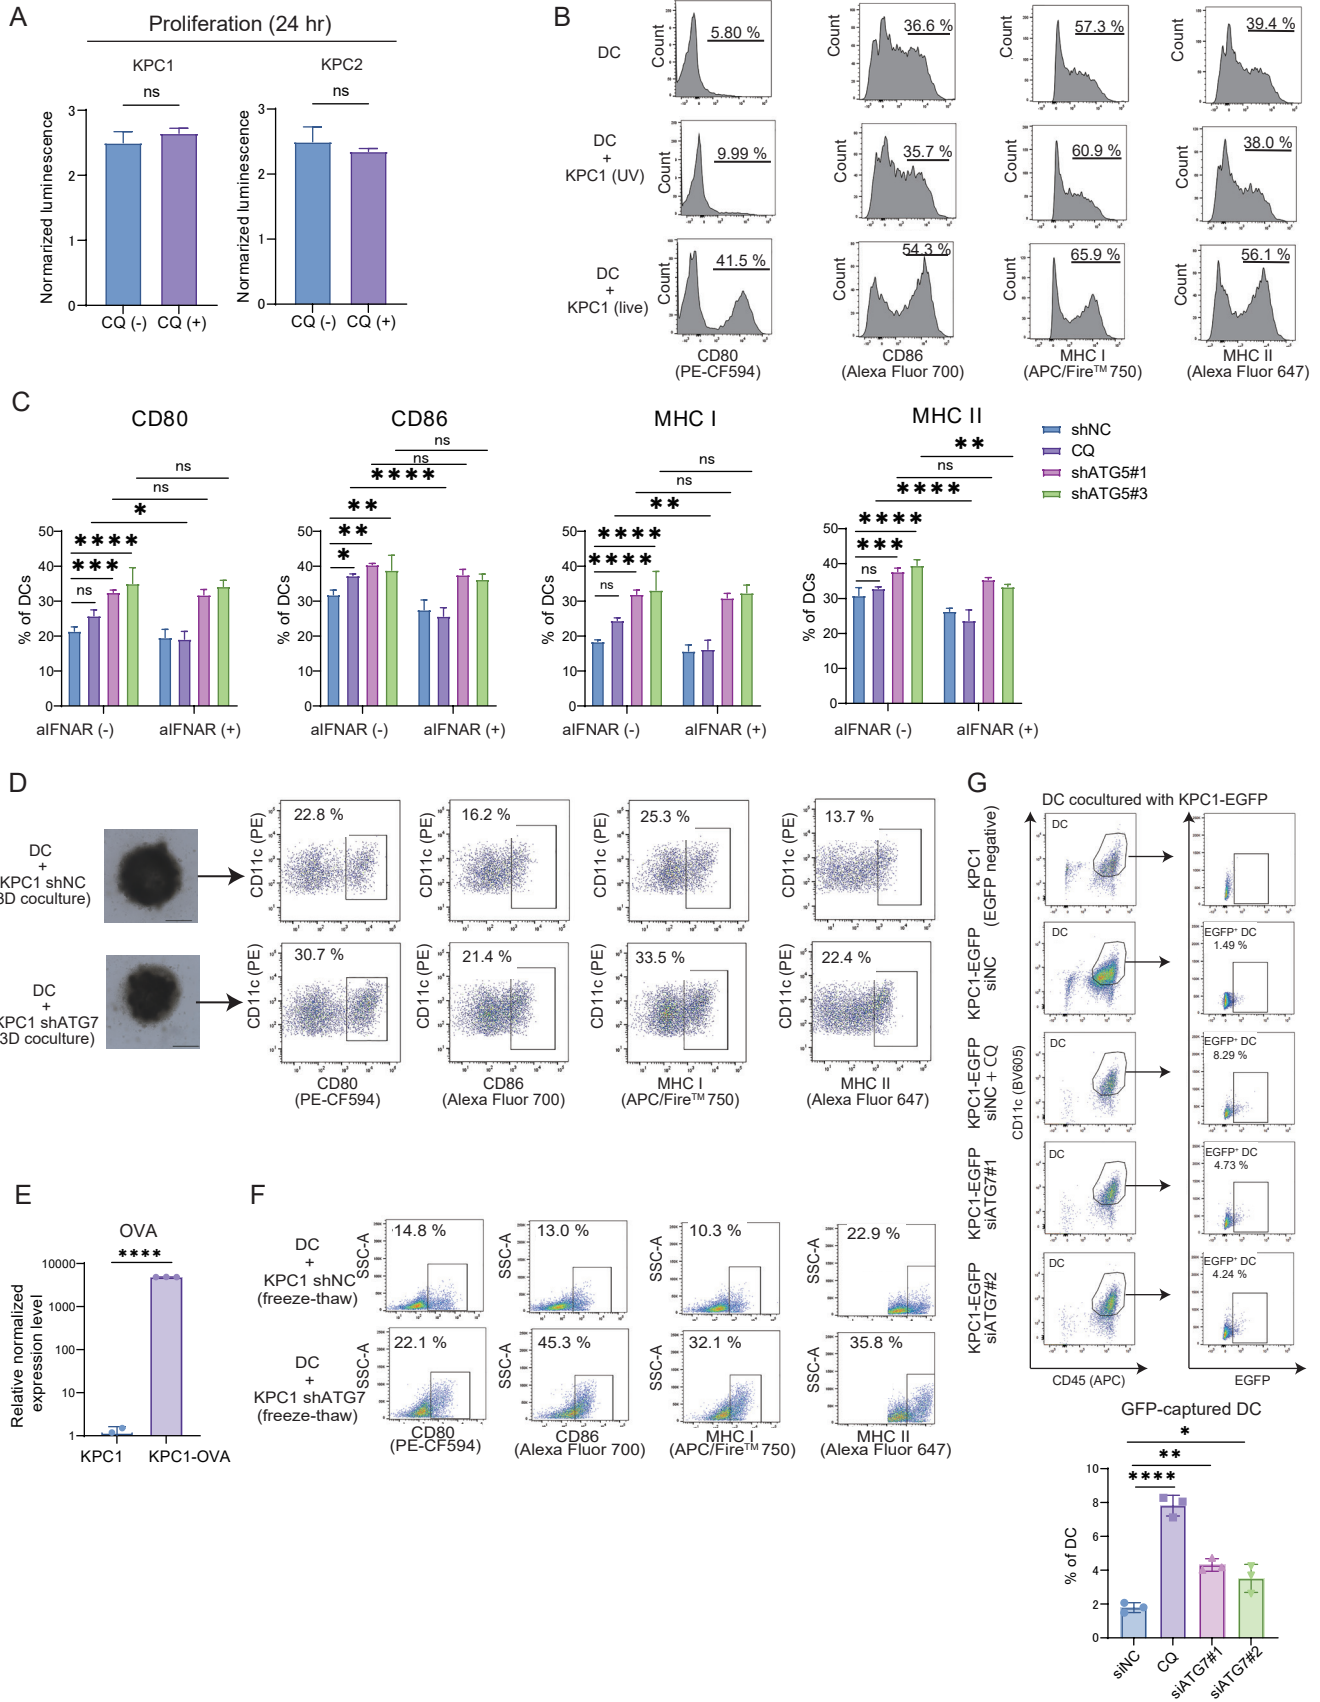

**Supplementary Fig. S6. Inhibiting autophagy in cancer cells increases the accumulation of intracellular antigens**

**(A)** 24-hour proliferation assay comparing the proliferation of control and CQ-treated KPC cells. All luminescence values at 24 hours were normalized to those at 0 hours.

**(B)** Flow cytometry analysis of activation and maturation markers in DCs cocultured with UV irradiated, apoptotic KPC cells or those cocultured with live KPC cells.

**(C)** Flow cytometry analysis of the expression of the activation and maturation markers, CD80, CD86, MHC I, and MHC II in DCs cocultured with KPC1 shNC, KPC1 treated with 20  $\mu$ M CQ, or KPC1 shATG5#1, #3, in the presence of an anti-IFNAR1 blocking antibody or its IgG isotype control.

**(D)** Flow cytometry analysis of activation and maturation markers in DCs cocultured with KPC1 shNC or shATG7 cell in a 3D coculture assay.

**(E)** OVA expression in KPC1-OVA cells was confirmed by quantitative real-time PCR.

**(F)** Flow cytometry analysis of DCs cocultured with necrotic KPC1 shNC or shATG7 cells, which had been subjected to freeze-thawing to promote antigen release.

**(G)** DCs were cocultured with KPC1 cells expressing no EGFP (negative control), KPC1-EGFP siNC, KPC1-EGFP, KPC1-EGFP + 20  $\mu$ M CQ, or KPC1-EGFP siATG7#1, #2. Flow cytometry was used to detect the EGFP signal in DCs to compare the amount of antigen captured by DCs. Representative dot plots are shown.

Bars, median; Error bars, mean  $\pm$  SD; \* $p$  < 0.05, \*\* $p$  < 0.01, \*\*\* $p$  < 0.001, \*\*\*\* $p$  < 0.001; analyzed using the one-way ANOVA (C, G), Student's t-test (A, E).
