# Supplementary material for: Combined Autophagy Inhibition and Dendritic Cell Recruitment Induces Antitumor Immunity and Enhances Immune Checkpoint Blockade Sensitivity in Pancreatic Cancer
Source: PubMed Central journal article supplement — Cancer Res. 2024 Sep 17;84(24):4214–32. doi: 10.1158/0008-5472.CAN-24-0830 (PMC11647207; doi:10.1158/0008-5472.can-24-0830), 2024-09-17
Supplement: can-24-0830_figure_s7_suppsf7.pdf [file can-24-0830_figure_s7_suppsf7.pdf]

# Supplementary Figure S7

A

2nd challenge tumors (shATG5)

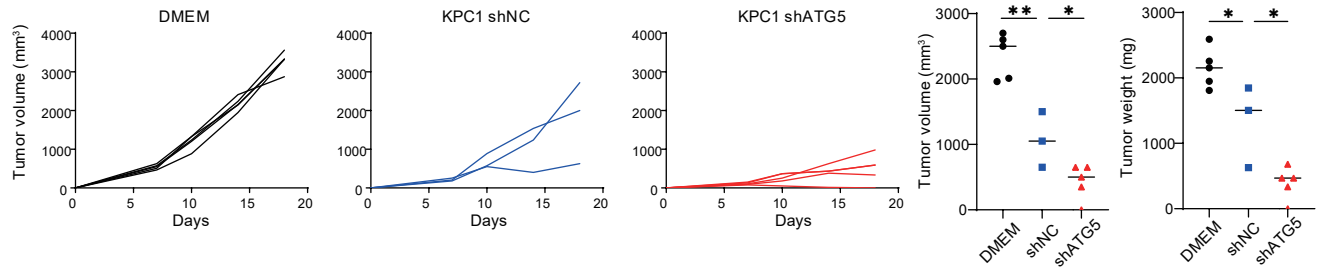

B

Vehicle

CQ

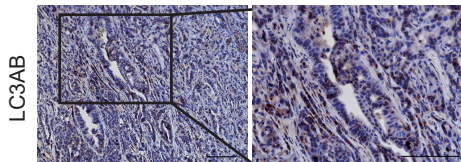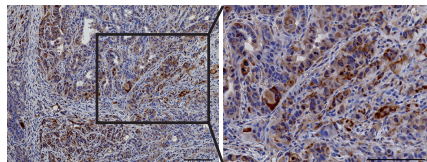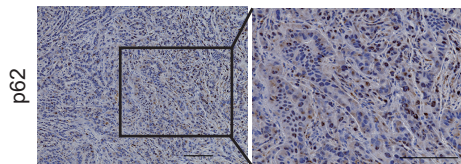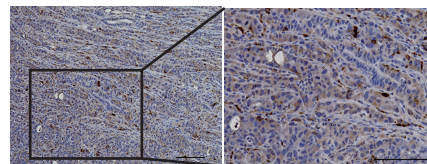

LC3AB

p62

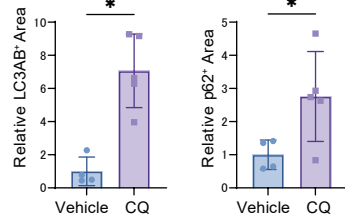

**Supplementary Fig. S7. Vaccination experiments with KPC1 shNC/shATG5 and confirmation of the effect of CQ treatment**

**(A)** Individual tumor growth curves and the corresponding quantification of the secondary tumors from mice vaccinated with vehicle, KPC1 shNC, or KPC1 shATG5, on Day 18.

**(B)** IHC analysis for LC3AB and p62 in the tumors treated with vehicle or CQ in Fig. 4G.

Scale bars, 100  $\mu\text{m}$  (B). Error bars, mean  $\pm$  SD; Bars, median. \* $p < 0.05$ , \*\* $p < 0.01$ , \*\*\*\* $p < 0.0001$ ; ns, not significant; analyzed using the Student's t-test or Mann-Whitney test.
