# Supplementary material for: Combined Autophagy Inhibition and Dendritic Cell Recruitment Induces Antitumor Immunity and Enhances Immune Checkpoint Blockade Sensitivity in Pancreatic Cancer
Source: PubMed Central journal article supplement — Cancer Res. 2024 Sep 17;84(24):4214–32. doi: 10.1158/0008-5472.CAN-24-0830 (PMC11647207; doi:10.1158/0008-5472.can-24-0830), 2024-09-17
Supplement: can-24-0830_figure_s9_suppsf9.pdf [file can-24-0830_figure_s9_suppsf9.pdf]

Supplementary Figure S9

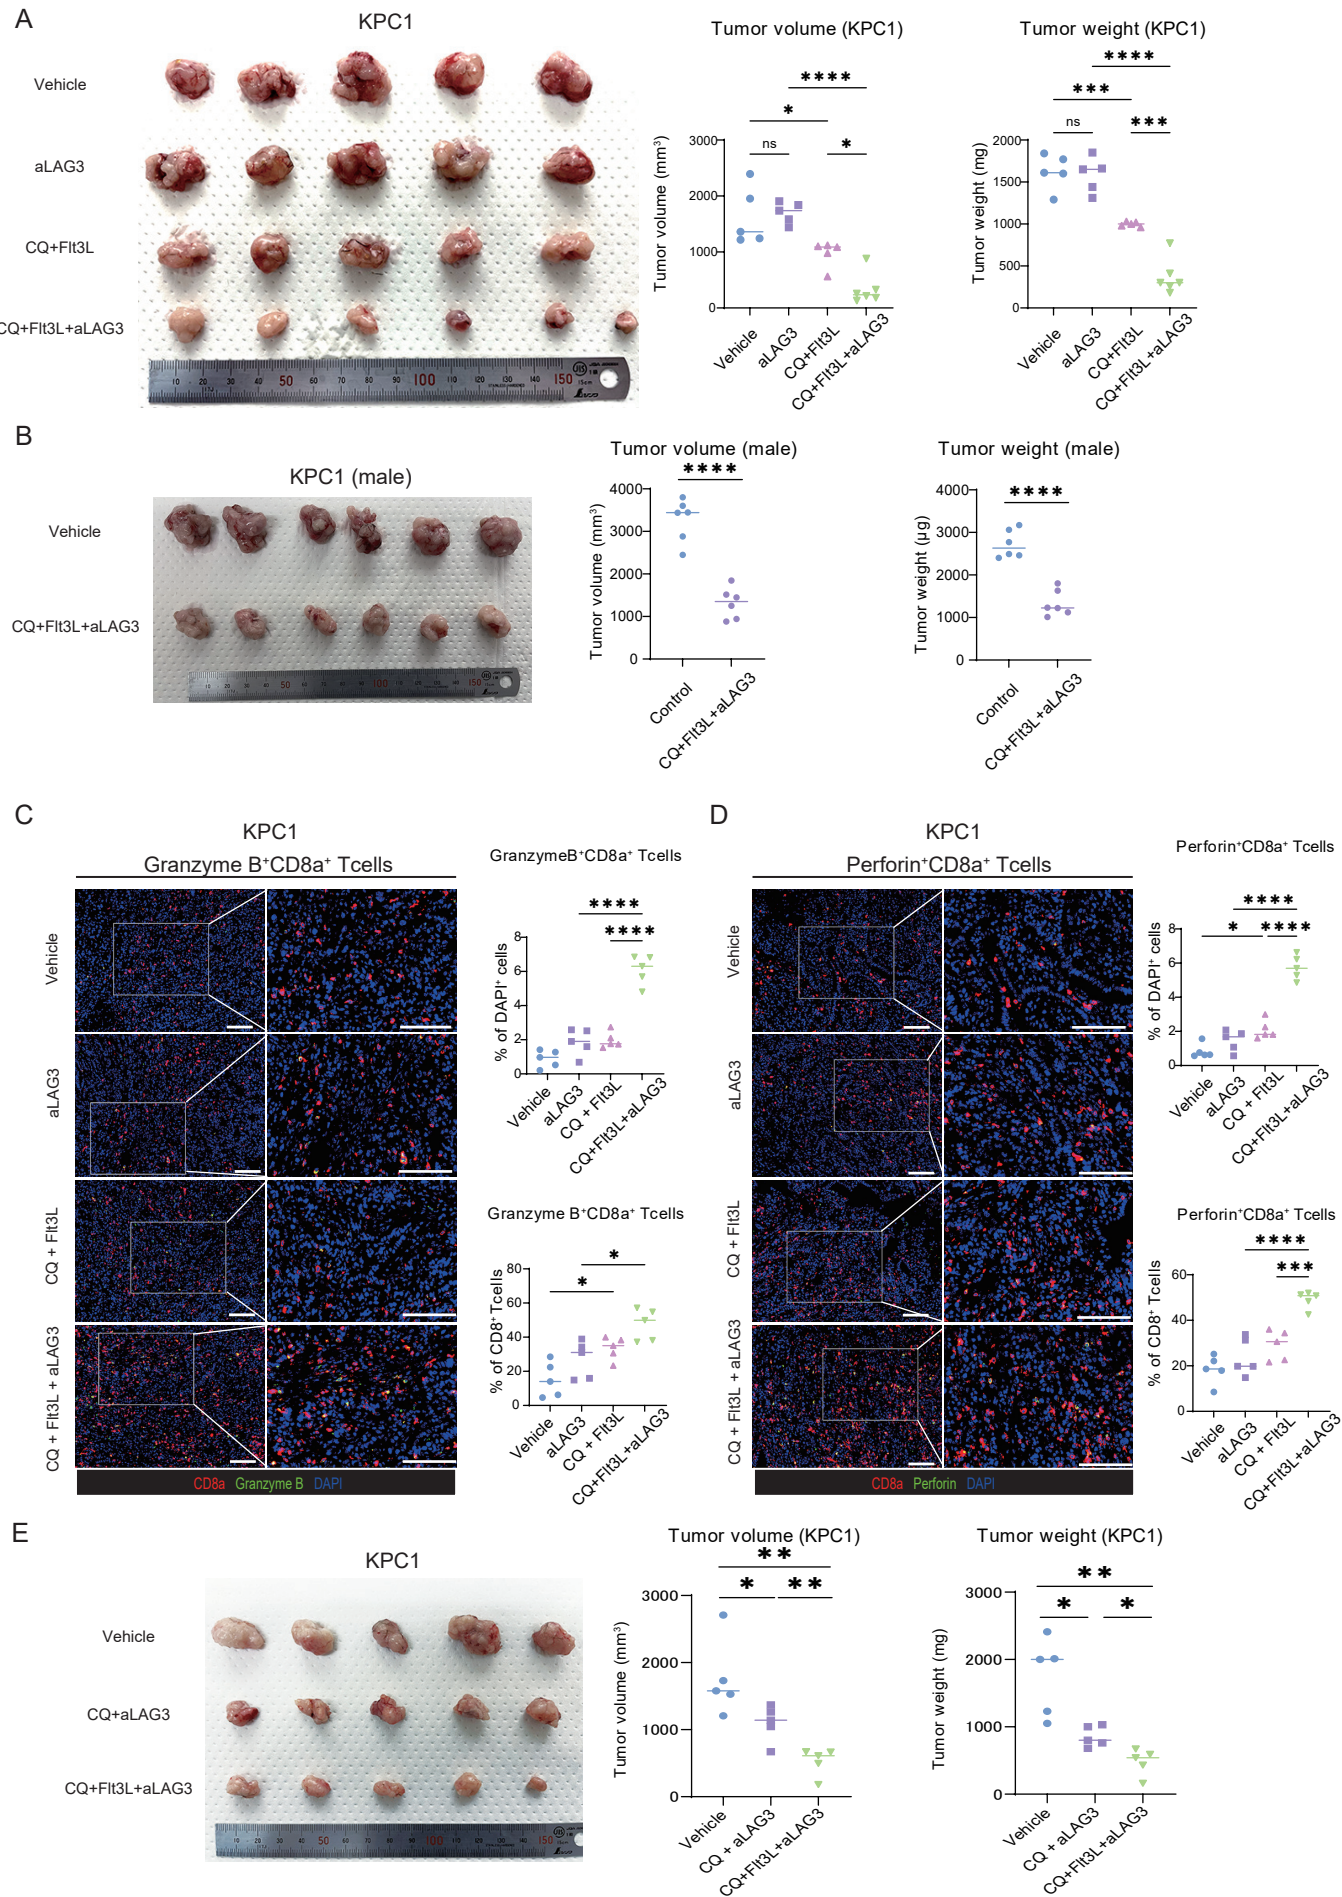

**Supplementary Fig. S9. Triplet therapy comprising CQ, Flt3L, and aLAG3 markedly suppresses tumor growth**

**(A)** KPC1 cells were orthotopically transplanted into female C57BL/6 mice. Tumor-bearing mice were treated with vehicle, aLAG3 (50  $\mu$ g), CQ (60 mg/kg) + Flt3L (10  $\mu$ g), or CQ + Flt3L +aLAG3. After 21 days of treatment, the tumor volumes and weights were measured.

**(B)** KPC1 cells were orthotopically transplanted into male C57BL/6 mice. Tumor-bearing mice were treated with vehicle or CQ + Flt3L +aLAG3. After 28 days of treatment, the tumor volumes and weights were measured.

**(C, D)** Representative immunofluorescence images of cytotoxic CD8<sup>+</sup> T cells, granzyme B<sup>+</sup> CD8a<sup>+</sup> T cells (CD8a [red] and granzyme B [green]) (B), and perforin<sup>+</sup> CD8a<sup>+</sup> T cells (CD8a [red] and

perforin [green]) (C). Quantification of granzyme B<sup>+</sup> CD8a<sup>+</sup> cells/DAPI<sup>+</sup> cells (%) and granzyme B<sup>+</sup> CD8a<sup>+</sup> cells/CD8a<sup>+</sup> cells (%) (B); and perforin<sup>+</sup> CD8a<sup>+</sup> cells/DAPI<sup>+</sup> cells (%) and perforin<sup>+</sup> CD8a<sup>+</sup> cells/CD8a<sup>+</sup> cells (%) (C) is shown.

**(E)** Treatment experiments were performed to compare the triple therapy (with Flt3L) and CQ+aLAG3 (without Flt3L) in orthotopic syngeneic PDAC tumors (KPC1).

Scale bars, 100  $\mu$ m (B and C). Bars, median; \*p < 0.05, \*\*p < 0.01, \*\*\*p < 0.001, \*\*\*\*p < 0.0001; ns, not significant; analyzed using the one-way ANOVA (A-D).
