# Supplementary material for: Combined Autophagy Inhibition and Dendritic Cell Recruitment Induces Antitumor Immunity and Enhances Immune Checkpoint Blockade Sensitivity in Pancreatic Cancer
Source: PubMed Central journal article supplement — Cancer Res. 2024 Sep 17;84(24):4214–32. doi: 10.1158/0008-5472.CAN-24-0830 (PMC11647207; doi:10.1158/0008-5472.can-24-0830), 2024-09-17
Supplement: can-24-0830_table_s2_suppst2.pdf [file can-24-0830_table_s2_suppst2.pdf]

**Table S2. Lists of autophagy-related genes used to calculate the autophagy signature scores of ductal cells**

|                                   |
|-----------------------------------|
| Autophagy related genes           |
| WP_AUTOPHAGY<br>(gsea-msigdb.org) |
| <i>ATG14</i>                      |
| <i>MTOR</i>                       |
| <i>WIPI2</i>                      |
| <i>PIK3C3</i>                     |
| <i>PRKAG2</i>                     |
| <i>PIK3C3</i>                     |
| <i>PRKAG3</i>                     |
| <i>ATG16L1</i>                    |
| <i>PRKAA1</i>                     |
| <i>PRKAB1</i>                     |
| <i>PRKAB2</i>                     |
| <i>PRKAG1</i>                     |
| <i>RPTOR</i>                      |
| <i>ATG101</i>                     |
| <i>MLST8</i>                      |
| <i>ATG3</i>                       |
| <i>DEPTOR</i>                     |
| <i>UVRAG</i>                      |
| <i>ATG9A</i>                      |
| <i>MAP1LC3B</i>                   |
| <i>ULK1</i>                       |
| <i>AKT1S1</i>                     |
| <i>BECN1</i>                      |
| <i>ATG12</i>                      |
| <i>ATG5</i>                       |
| <i>ATG13</i>                      |
| <i>RB1CC1</i>                     |
