# Supplementary material for: Combined Autophagy Inhibition and Dendritic Cell Recruitment Induces Antitumor Immunity and Enhances Immune Checkpoint Blockade Sensitivity in Pancreatic Cancer
Source: PubMed Central journal article supplement — Cancer Res. 2024 Sep 17;84(24):4214–32. doi: 10.1158/0008-5472.CAN-24-0830 (PMC11647207; doi:10.1158/0008-5472.can-24-0830), 2024-09-17
Supplement: can-24-0830_table_s3_suppst3.pdf [file can-24-0830_table_s3_suppst3.pdf]

**Table S3. Autophagy signature scores for each sample from the public PDAC patient scRNA-seq dataset**

| Sample<br>(T:PDAC, N:Normal pancreas) | Autophagy signature score | Autophagy signature score |              |
|---------------------------------------|---------------------------|---------------------------|--------------|
|                                       |                           | Low (<mean)               | High (>mean) |
| T1                                    | 3.685                     | T1                        | T4           |
| T2                                    | 3.828                     | T2                        | T7           |
| T3                                    | 3.939                     | T3                        | T10          |
| T4                                    | 4.439                     | T5                        | T12          |
| T5                                    | 3.262                     | T6                        | T14          |
| T6                                    | 3.965                     | T8                        | T15          |
| T7                                    | 4.186                     | T9                        | T17          |
| T8                                    | 3.668                     | T11                       | T18          |
| T9                                    | 3.576                     | T13                       | T21          |
| T10                                   | 4.311                     | T16                       | T22          |
| T11                                   | 3.729                     | T19                       | T23          |
| T12                                   | 4.238                     | T20                       |              |
| T13                                   | 3.685                     | T24                       |              |
| T14                                   | 4.903                     |                           |              |
| T15                                   | 4.09                      |                           |              |
| T16                                   | 3.903                     |                           |              |
| T17                                   | 4.692                     |                           |              |
| T18                                   | 4.28                      |                           |              |
| T19                                   | 3.971                     |                           |              |
| T20                                   | 3.784                     |                           |              |
| T21                                   | 4.336                     |                           |              |
| T22                                   | 4.313                     |                           |              |
| T23                                   | 4.432                     |                           |              |
| T24                                   | 3.798                     |                           |              |
| N1                                    | 3.244                     |                           |              |
| N2                                    | 3.247                     |                           |              |
| N3                                    | 2.145                     |                           |              |
| N4                                    | 3.889                     |                           |              |
| N5                                    | 2.927                     |                           |              |
| N7                                    | 2.65                      |                           |              |

|     |       |  |  |
|-----|-------|--|--|
| N8  | 3.276 |  |  |
| N9  | 3.313 |  |  |
| N10 | 2.968 |  |  |
| N11 | 2.268 |  |  |
