# Supplementary material for: Combined Autophagy Inhibition and Dendritic Cell Recruitment Induces Antitumor Immunity and Enhances Immune Checkpoint Blockade Sensitivity in Pancreatic Cancer
Source: PubMed Central journal article supplement — Cancer Res. 2024 Sep 17;84(24):4214–32. doi: 10.1158/0008-5472.CAN-24-0830 (PMC11647207; doi:10.1158/0008-5472.can-24-0830), 2024-09-17
Supplement: can-24-0830_table_s4_suppsf4.pdf [file can-24-0830_table_s4_suppsf4.pdf]

**Table S4. Gene lists and sources of each gene sets used in the analysis of public PDAC patient scRNA-seq data**

| Antigen-presenting genes    | Interferon-induced genes    | Exhaustion genes       |
|-----------------------------|-----------------------------|------------------------|
| Baldominos, P., et al. 2022 | Baldominos, P., et al. 2022 | Bhatt, D., et al. 2021 |
| <i>ISG15</i>                | <i>IFI44</i>                | <i>TIGIT</i>           |
| <i>IRF7</i>                 | <i>IFI35</i>                | <i>PDCD1</i>           |
| <i>HLA-C</i>                | <i>GBP7</i>                 | <i>HAVCR2</i>          |
| <i>HLA-DRB1</i>             | <i>GBP5</i>                 | <i>LAG3</i>            |
| <i>HLA-DRA</i>              | <i>GBP2</i>                 |                        |
| <i>HLA-E</i>                | <i>ISG15</i>                |                        |
| <i>HLA-A</i>                | <i>IRF7</i>                 |                        |
| <i>B2M</i>                  | <i>IRF2</i>                 |                        |
| <i>TAPBP</i>                |                             |                        |
| <i>TAP1</i>                 |                             |                        |
| <i>PSMB10</i>               |                             |                        |
| <i>CD81</i>                 |                             |                        |
| <i>IL12A</i>                |                             |                        |
| <i>FSCN1</i>                |                             |                        |
