# Supplementary material for: Combined Autophagy Inhibition and Dendritic Cell Recruitment Induces Antitumor Immunity and Enhances Immune Checkpoint Blockade Sensitivity in Pancreatic Cancer
Source: PubMed Central journal article supplement — Cancer Res. 2024 Sep 17;84(24):4214–32. doi: 10.1158/0008-5472.CAN-24-0830 (PMC11647207; doi:10.1158/0008-5472.can-24-0830), 2024-09-17
Supplement: can-24-0830_table_s5_suppst5.pdf [file can-24-0830_table_s5_suppst5.pdf]

**Table S5.** Relationship Between Cancer Cell-LC3 Expression and Clinicopathologic Factors

| Characteristics        |         | LC3 <sup>+</sup> cancer cells low | LC3 <sup>+</sup> cancer cells high | <i>P</i> value |
|------------------------|---------|-----------------------------------|------------------------------------|----------------|
|                        |         | n=19 (48.7 %)                     | n=20 (51.3 %)                      |                |
| Age                    | <70     | 12 (63 %)                         | 7 (35 %)                           | 0.0787         |
|                        | ≥ 70    | 7 (37 %)                          | 13 (65 %)                          |                |
| Sex                    | Male    | 9 (47 %)                          | 10 (50 %)                          | 0.8695         |
|                        | Female  | 10 (53 %)                         | 10 (50 %)                          |                |
| pT category            | pT1/pT2 | 4 (21 %)                          | 1 (5 %)                            | 0.1339         |
|                        | pT3/pT4 | 15 (79 %)                         | 19 (95 %)                          |                |
| Lymph node metastasis  | No      | 10 (53 %)                         | 7 (35 %)                           | 0.267          |
|                        | Yes     | 9 (47 %)                          | 13 (65 %)                          |                |
| UICC stage             | I       | 4 (21 %)                          | 0 (0 %)                            | 0.0769         |
|                        | II      | 12 (63 %)                         | 14 (70 %)                          |                |
|                        | III     | 3 (16 %)                          | 6 (30 %)                           |                |
| Perilymphatic invasion | No      | 15 (79 %)                         | 10 (50 %)                          | 0.0596         |
|                        | Yes     | 4 (21 %)                          | 10 (50 %)                          |                |
| Perivascular invasion  | No      | 16 (84 %)                         | 11 (55 %)                          | <b>0.0482</b>  |
|                        | Yes     | 3 (16 %)                          | 9 (45 %)                           |                |
| Perineural invasion    | No      | 5 (26 %)                          | 3 (15 %)                           | 0.3817         |
|                        | Yes     | 14 (74 %)                         | 17 (85 %)                          |                |
| CEA (ng/ml)            | <5.0    | 14 (74 %)                         | 17 (85 %)                          | 0.3817         |
|                        | ≥ 5.0   | 5 (26 %)                          | 3 (15 %)                           |                |
| CA19-9 (U/ml)          | <37.0   | 10 (56 %)                         | 8 (40 %)                           | 0.429          |
|                        | ≥ 37.0  | 9 (44 %)                          | 12 (60 %)                          |                |

The  $\chi^2$  test was performed to analyze correlations between LC3 expression in the immunohistochemical analyses and the clinicopathologic characteristics.
