# Supplementary material for: Combined Autophagy Inhibition and Dendritic Cell Recruitment Induces Antitumor Immunity and Enhances Immune Checkpoint Blockade Sensitivity in Pancreatic Cancer
Source: PubMed Central journal article supplement — Cancer Res. 2024 Sep 17;84(24):4214–32. doi: 10.1158/0008-5472.CAN-24-0830 (PMC11647207; doi:10.1158/0008-5472.can-24-0830), 2024-09-17
Supplement: can-24-0830_table_s6_suppst6.pdf [file can-24-0830_table_s6_suppst6.pdf]

**Table S6. Top 30 DEGs for four DC clusters identified from scRNA-seq of CD45<sup>+</sup> immune cells in KPC1 shNC / shATG7 syngeneic PDAC tumors**

| <i>gene</i>    | <i>p_val</i> | <i>avg_logFC</i> | <i>pct.1</i> | <i>pct.2</i> | <i>p_val_adj</i> | <i>cluster</i> |
|----------------|--------------|------------------|--------------|--------------|------------------|----------------|
| <i>Ifitm1</i>  | 6.40E-34     | 2.025566         | 0.646        | 0.122        | 8.82E-30         | DC2            |
| <i>Ifitm3</i>  | 1.07E-33     | 1.523751         | 0.738        | 0.223        | 1.48E-29         | DC2            |
| <i>S100a6</i>  | 5.31E-32     | 1.439727         | 0.8          | 0.328        | 7.32E-28         | DC2            |
| <i>Fcer1g</i>  | 1.38E-26     | 1.377945         | 0.65         | 0.206        | 1.91E-22         | DC2            |
| <i>Wfdc17</i>  | 1.42E-26     | 1.523378         | 0.55         | 0.097        | 1.95E-22         | DC2            |
| <i>Tyrobp</i>  | 1.43E-22     | 0.883029         | 0.829        | 0.466        | 1.98E-18         | DC2            |
| <i>Napsa</i>   | 2.04E-21     | 1.020778         | 0.733        | 0.345        | 2.81E-17         | DC2            |
| <i>Fth1</i>    | 6.92E-20     | 0.65868          | 0.95         | 0.819        | 9.54E-16         | DC2            |
| <i>Mdh2</i>    | 6.34E-19     | 1.139456         | 0.583        | 0.235        | 8.74E-15         | DC2            |
| <i>Mt1</i>     | 3.48E-18     | 1.234359         | 0.554        | 0.189        | 4.80E-14         | DC2            |
| <i>Mgl2</i>    | 9.78E-18     | 1.117966         | 0.396        | 0.067        | 1.35E-13         | DC2            |
| <i>Il1r2</i>   | 8.56E-17     | 1.325994         | 0.333        | 0.038        | 1.18E-12         | DC2            |
| <i>Clec4n</i>  | 1.01E-16     | 0.991665         | 0.304        | 0.021        | 1.40E-12         | DC2            |
| <i>Cfp</i>     | 1.67E-16     | 1.084971         | 0.454        | 0.122        | 2.30E-12         | DC2            |
| <i>Ifitm6</i>  | 3.40E-16     | 1.136247         | 0.312        | 0.034        | 4.68E-12         | DC2            |
| <i>Ms4a6c</i>  | 1.73E-15     | 0.938043         | 0.358        | 0.059        | 2.39E-11         | DC2            |
| <i>S100a10</i> | 2.19E-15     | 1.059879         | 0.425        | 0.109        | 3.02E-11         | DC2            |
| <i>Ffar2</i>   | 8.09E-15     | 1.015787         | 0.275        | 0.021        | 1.12E-10         | DC2            |
| <i>Lilrb4a</i> | 1.12E-14     | 1.106401         | 0.383        | 0.084        | 1.55E-10         | DC2            |
| <i>Cdh1</i>    | 2.52E-14     | 0.949579         | 0.279        | 0.025        | 3.48E-10         | DC2            |
| <i>Ctsc</i>    | 3.28E-14     | 1.053782         | 0.425        | 0.134        | 4.53E-10         | DC2            |
| <i>B4galt6</i> | 4.24E-14     | 0.873468         | 0.292        | 0.034        | 5.86E-10         | DC2            |
| <i>Plac8</i>   | 1.06E-13     | 0.669849         | 0.612        | 0.252        | 1.46E-09         | DC2            |
| <i>Ccl6</i>    | 1.12E-13     | 1.056609         | 0.267        | 0.025        | 1.54E-09         | DC2            |
| <i>Il1b</i>    | 1.18E-13     | 1.231296         | 0.442        | 0.134        | 1.63E-09         | DC2            |
| <i>Rpl38</i>   | 7.76E-13     | 0.296779         | 0.996        | 0.954        | 1.07E-08         | DC2            |
| <i>Ifitm2</i>  | 7.90E-13     | 0.923814         | 0.446        | 0.164        | 1.09E-08         | DC2            |
| <i>Cybb</i>    | 1.71E-12     | 0.739776         | 0.342        | 0.071        | 2.36E-08         | DC2            |
| <i>Tgm2</i>    | 6.82E-12     | 0.929439         | 0.271        | 0.042        | 9.41E-08         | DC2            |
| <i>Cebpb</i>   | 1.36E-11     | 0.86926          | 0.292        | 0.059        | 1.88E-07         | DC2            |
| <i>Psap</i>    | 5.30E-44     | 1.378887         | 0.979        | 0.799        | 7.31E-40         | DC1            |
| <i>Xcr1</i>    | 1.59E-42     | 1.890379         | 0.5          | 0.006        | 2.20E-38         | DC1            |

|                      |          |          |       |       |          |       |
|----------------------|----------|----------|-------|-------|----------|-------|
| <i>Irf8</i>          | 2.12E-41 | 1.59969  | 0.799 | 0.201 | 2.93E-37 | DC1   |
| <i>Ppt1</i>          | 1.12E-39 | 2.0182   | 0.639 | 0.099 | 1.55E-35 | DC1   |
| <i>Naaa</i>          | 1.93E-34 | 1.562631 | 0.806 | 0.332 | 2.67E-30 | DC1   |
| <i>Cst3</i>          | 9.87E-34 | 0.840172 | 0.993 | 0.94  | 1.36E-29 | DC1   |
| <i>Dnase1l3</i>      | 2.41E-31 | 1.77647  | 0.549 | 0.084 | 3.32E-27 | DC1   |
| <i>Clec9a</i>        | 3.26E-28 | 1.373973 | 0.368 | 0.012 | 4.50E-24 | DC1   |
| <i>Mpeg1</i>         | 4.55E-28 | 1.463679 | 0.708 | 0.254 | 6.28E-24 | DC1   |
| <i>Rab7b</i>         | 1.54E-25 | 1.156027 | 0.319 | 0.006 | 2.12E-21 | DC1   |
| <i>E330020D12Rik</i> | 1.23E-23 | 1.387364 | 0.306 | 0.009 | 1.70E-19 | DC1   |
| <i>Tmsb10</i>        | 1.14E-20 | 0.608614 | 1     | 0.943 | 1.57E-16 | DC1   |
| <i>Tlr3</i>          | 1.38E-20 | 1.159415 | 0.312 | 0.024 | 1.90E-16 | DC1   |
| <i>Ckb</i>           | 2.13E-18 | 1.044157 | 0.646 | 0.269 | 2.93E-14 | DC1   |
| <i>Plbd1</i>         | 6.98E-18 | 1.003429 | 0.694 | 0.359 | 9.63E-14 | DC1   |
| <i>Cadm1</i>         | 8.89E-18 | 1.224362 | 0.285 | 0.027 | 1.23E-13 | DC1   |
| <i>Asb2</i>          | 3.70E-16 | 1.026457 | 0.458 | 0.132 | 5.11E-12 | DC1   |
| <i>Cd36</i>          | 5.17E-15 | 1.063892 | 0.285 | 0.042 | 7.14E-11 | DC1   |
| <i>Txn1</i>          | 1.27E-14 | 0.868535 | 0.736 | 0.419 | 1.76E-10 | DC1   |
| <i>Itgae</i>         | 1.48E-14 | 0.930452 | 0.562 | 0.246 | 2.04E-10 | DC1   |
| <i>Cd52</i>          | 3.63E-14 | 0.784629 | 0.84  | 0.716 | 5.01E-10 | DC1   |
| <i>Tnni2</i>         | 1.18E-13 | 0.857968 | 0.479 | 0.159 | 1.63E-09 | DC1   |
| <i>Ucp2</i>          | 3.24E-13 | 0.909542 | 0.694 | 0.437 | 4.47E-09 | DC1   |
| <i>Actb</i>          | 3.84E-13 | 0.307754 | 1     | 1     | 5.29E-09 | DC1   |
| <i>Wdfy4</i>         | 5.84E-13 | 0.943124 | 0.569 | 0.284 | 8.05E-09 | DC1   |
| <i>Gm2a</i>          | 2.14E-12 | 0.688297 | 0.847 | 0.593 | 2.95E-08 | DC1   |
| <i>Slc8b1</i>        | 4.14E-12 | 0.879796 | 0.264 | 0.048 | 5.72E-08 | DC1   |
| <i>Atpif1</i>        | 3.57E-11 | 0.780189 | 0.736 | 0.566 | 4.93E-07 | DC1   |
| <i>Btla</i>          | 1.14E-10 | 0.958639 | 0.285 | 0.072 | 1.57E-06 | DC1   |
| <i>Ifi205</i>        | 1.58E-10 | 0.995528 | 0.424 | 0.174 | 2.18E-06 | DC1   |
| <i>Fscn1</i>         | 1.54E-80 | 3.228989 | 0.803 | 0.002 | 2.13E-76 | migDC |
| <i>Ccr7</i>          | 6.47E-78 | 3.371022 | 0.895 | 0.032 | 8.92E-74 | migDC |
| <i>Ccl5</i>          | 2.55E-60 | 3.318143 | 0.763 | 0.037 | 3.52E-56 | migDC |
| <i>Cacnb3</i>        | 5.44E-53 | 2.220245 | 0.566 | 0.005 | 7.50E-49 | migDC |
| <i>Tmem123</i>       | 1.77E-50 | 2.362286 | 0.842 | 0.117 | 2.44E-46 | migDC |
| <i>Samsn1</i>        | 2.24E-50 | 2.493645 | 0.816 | 0.109 | 3.09E-46 | migDC |
| <i>Ccl22</i>         | 9.41E-47 | 2.749276 | 0.645 | 0.04  | 1.30E-42 | migDC |

|                 |          |          |       |       |          |       |
|-----------------|----------|----------|-------|-------|----------|-------|
| <i>Il4i1</i>    | 9.35E-46 | 1.63723  | 0.539 | 0.012 | 1.29E-41 | migDC |
| <i>Marcksl1</i> | 6.43E-45 | 2.021785 | 0.632 | 0.04  | 8.86E-41 | migDC |
| <i>Adcy6</i>    | 1.62E-42 | 1.439508 | 0.434 | 0     | 2.24E-38 | migDC |
| <i>Cd63</i>     | 7.21E-42 | 1.921896 | 0.592 | 0.037 | 9.94E-38 | migDC |
| <i>Anxa3</i>    | 9.51E-40 | 1.776685 | 0.474 | 0.012 | 1.31E-35 | migDC |
| <i>Arl5c</i>    | 1.55E-39 | 1.538245 | 0.447 | 0.007 | 2.14E-35 | migDC |
| <i>Stat4</i>    | 7.22E-37 | 1.601587 | 0.539 | 0.037 | 9.95E-33 | migDC |
| <i>Tbc1d4</i>   | 1.36E-36 | 2.236673 | 0.75  | 0.144 | 1.87E-32 | migDC |
| <i>Glpr2</i>    | 3.47E-35 | 1.901824 | 0.526 | 0.04  | 4.79E-31 | migDC |
| <i>Mmp25</i>    | 5.10E-35 | 1.537628 | 0.487 | 0.027 | 7.04E-31 | migDC |
| <i>Ramp3</i>    | 5.56E-35 | 1.795166 | 0.487 | 0.027 | 7.67E-31 | migDC |
| <i>Traf1</i>    | 5.37E-31 | 1.620994 | 0.671 | 0.117 | 7.41E-27 | migDC |
| <i>Socs2</i>    | 1.36E-30 | 1.612708 | 0.487 | 0.04  | 1.87E-26 | migDC |
| <i>Cd83</i>     | 2.45E-30 | 1.706367 | 0.711 | 0.139 | 3.38E-26 | migDC |
| <i>Gadd45b</i>  | 3.32E-30 | 1.697739 | 0.645 | 0.109 | 4.59E-26 | migDC |
| <i>AW112010</i> | 2.47E-29 | 2.052108 | 0.776 | 0.244 | 3.41E-25 | migDC |
| <i>Fabp5</i>    | 2.79E-29 | 2.181211 | 0.566 | 0.08  | 3.85E-25 | migDC |
| <i>Relb</i>     | 6.53E-28 | 1.518147 | 0.513 | 0.062 | 9.00E-24 | migDC |
| <i>Gyg</i>      | 3.83E-27 | 1.773335 | 0.539 | 0.077 | 5.29E-23 | migDC |
| <i>Gm13546</i>  | 5.17E-27 | 1.050551 | 0.276 | 0     | 7.13E-23 | migDC |
| <i>Sema7a</i>   | 8.23E-27 | 1.392704 | 0.526 | 0.07  | 1.14E-22 | migDC |
| <i>Mreg</i>     | 8.55E-27 | 1.199488 | 0.289 | 0.002 | 1.18E-22 | migDC |
| <i>Serpinb9</i> | 1.81E-26 | 1.563937 | 0.553 | 0.082 | 2.50E-22 | migDC |
| <i>Siglech</i>  | 4.53E-91 | 3.587519 | 1     | 0.007 | 6.25E-87 | pDC   |
| <i>Cox6a2</i>   | 3.37E-70 | 3.361885 | 0.667 | 0     | 4.65E-66 | pDC   |
| <i>Ccr9</i>     | 4.51E-70 | 2.980039 | 0.833 | 0.009 | 6.22E-66 | pDC   |
| <i>Iglc3</i>    | 1.46E-67 | 2.602298 | 0.778 | 0.007 | 2.02E-63 | pDC   |
| <i>Ly6d</i>     | 1.36E-54 | 2.08324  | 0.611 | 0.004 | 1.88E-50 | pDC   |
| <i>Mctp2</i>    | 6.29E-53 | 1.51678  | 0.556 | 0.002 | 8.68E-49 | pDC   |
| <i>Gm21762</i>  | 8.92E-53 | 1.728122 | 0.5   | 0     | 1.23E-48 | pDC   |
| <i>Atp1b1</i>   | 2.14E-48 | 1.841558 | 0.556 | 0.004 | 2.95E-44 | pDC   |
| <i>Ly6c2</i>    | 2.04E-47 | 2.667148 | 0.611 | 0.009 | 2.81E-43 | pDC   |
| <i>Sell</i>     | 1.10E-33 | 2.081906 | 0.611 | 0.022 | 1.52E-29 | pDC   |
| <i>Tcf4</i>     | 2.16E-32 | 2.765599 | 1     | 0.104 | 2.98E-28 | pDC   |
| <i>Lrp8</i>     | 2.19E-32 | 1.636059 | 0.556 | 0.017 | 3.03E-28 | pDC   |

|                |          |          |       |       |          |     |
|----------------|----------|----------|-------|-------|----------|-----|
| <i>Sla2</i>    | 3.46E-32 | 1.450471 | 0.389 | 0.004 | 4.78E-28 | pDC |
| <i>Slco4a1</i> | 4.13E-32 | 1.560171 | 0.389 | 0.004 | 5.69E-28 | pDC |
| <i>Blnk</i>    | 1.62E-30 | 1.410393 | 0.333 | 0.002 | 2.23E-26 | pDC |
| <i>Sh3bgr</i>  | 7.72E-30 | 1.514151 | 0.278 | 0     | 1.07E-25 | pDC |
| <i>Spib</i>    | 7.49E-29 | 1.519937 | 0.444 | 0.011 | 1.03E-24 | pDC |
| <i>Fcrla</i>   | 7.05E-27 | 1.848565 | 0.444 | 0.013 | 9.72E-23 | pDC |
| <i>Prkca</i>   | 3.77E-26 | 1.664956 | 0.389 | 0.009 | 5.20E-22 | pDC |
| <i>Ctsl</i>    | 5.37E-24 | 2.292977 | 0.722 | 0.063 | 7.40E-20 | pDC |
| <i>Rasgrp2</i> | 7.93E-24 | 1.279323 | 0.389 | 0.011 | 1.09E-19 | pDC |
| <i>Adam11</i>  | 1.90E-23 | 1.660481 | 0.444 | 0.017 | 2.62E-19 | pDC |
| <i>Tex2</i>    | 1.16E-19 | 1.451753 | 0.444 | 0.024 | 1.60E-15 | pDC |
| <i>Epha2</i>   | 2.05E-19 | 1.737995 | 0.333 | 0.011 | 2.82E-15 | pDC |
| <i>Ripor2</i>  | 2.46E-19 | 1.15637  | 0.333 | 0.011 | 3.39E-15 | pDC |
| <i>Upb1</i>    | 1.48E-18 | 0.978375 | 0.278 | 0.007 | 2.04E-14 | pDC |
| <i>Runx2</i>   | 9.47E-18 | 1.602228 | 0.5   | 0.039 | 1.31E-13 | pDC |
| <i>Csf2rb2</i> | 1.44E-17 | 2.025797 | 0.722 | 0.1   | 1.99E-13 | pDC |
| <i>Bst2</i>    | 1.77E-17 | 2.068801 | 0.944 | 0.228 | 2.45E-13 | pDC |
| <i>Lair1</i>   | 1.06E-16 | 1.793576 | 0.611 | 0.07  | 1.47E-12 | pDC |
