# Supplementary material for: Combined Autophagy Inhibition and Dendritic Cell Recruitment Induces Antitumor Immunity and Enhances Immune Checkpoint Blockade Sensitivity in Pancreatic Cancer
Source: PubMed Central journal article supplement — Cancer Res. 2024 Sep 17;84(24):4214–32. doi: 10.1158/0008-5472.CAN-24-0830 (PMC11647207; doi:10.1158/0008-5472.can-24-0830), 2024-09-17
Supplement: can-24-0830_table_s7_suppst7.pdf [file can-24-0830_table_s7_suppst7.pdf]

**Table S7. Gene lists and sources for each DC-associated gene set used in the scRNA-seq analysis of CD45<sup>+</sup> immune cells from the KPC1 shNC/shATG7 syngeneic PDAC tumors**

| Antigen-presenting genes    | Interferon-induced genes    | Maturation genes       | Migration genes        | Regulatory genes       |
|-----------------------------|-----------------------------|------------------------|------------------------|------------------------|
| Baldominos, P., et al. 2022 | Baldominos, P., et al. 2022 | Maier, B., et al. 2020 | Maier, B., et al. 2020 | Maier, B., et al. 2020 |
| <i>Fscn1</i>                | <i>Irf2</i>                 | <i>Cd40</i>            | <i>Ccr7</i>            | <i>Cd274</i>           |
| <i>Il12a</i>                | <i>Irf7</i>                 | <i>Cd80</i>            | <i>Myo1g</i>           | <i>Pdcd1lg2</i>        |
| <i>Il12b</i>                | <i>Isg15</i>                | <i>Cd86</i>            | <i>Cxcl16</i>          | <i>Cd200</i>           |
| <i>Cd81</i>                 | <i>Gbp2</i>                 | <i>Relb</i>            | <i>Adam8</i>           | <i>Fas</i>             |
| <i>Psmb10</i>               | <i>Gbp5</i>                 | <i>Cd83</i>            | <i>Icam1</i>           | <i>Aldh1a2</i>         |
| <i>Tap1</i>                 | <i>Gbp7</i>                 |                        | <i>Fascn1</i>          | <i>Socs1</i>           |
| <i>Tapbp</i>                | <i>Ifi35</i>                |                        | <i>Marcks</i>          | <i>Socs2</i>           |
| <i>B2m</i>                  | <i>Ifi44</i>                |                        | <i>Marcks11</i>        |                        |
| <i>Cd74</i>                 | <i>Ifi204</i>               |                        |                        |                        |
| <i>H2-Aa</i>                | <i>Ifi205</i>               |                        |                        |                        |
| <i>Irf7</i>                 | <i>Ifi211</i>               |                        |                        |                        |
| <i>Isg15</i>                |                             |                        |                        |                        |
| <i>Ifi209</i>               |                             |                        |                        |                        |
