# Supplementary material for: Combined Autophagy Inhibition and Dendritic Cell Recruitment Induces Antitumor Immunity and Enhances Immune Checkpoint Blockade Sensitivity in Pancreatic Cancer
Source: PubMed Central journal article supplement — Cancer Res. 2024 Sep 17;84(24):4214–32. doi: 10.1158/0008-5472.CAN-24-0830 (PMC11647207; doi:10.1158/0008-5472.can-24-0830), 2024-09-17
Supplement: can-24-0830_table_s8_suppst8.pdf [file can-24-0830_table_s8_suppst8.pdf]

**Table S8. Top 30 DEGs for three CD8<sup>+</sup> T cell clusters identified from scRNA-seq of CD45 + immune cells in KPC1 shNC / shATG7 transplanted syngeneic PDAC tumors**

| <i>gene</i>    | <i>p_val</i> | <i>avg_logFC</i> | <i>pct.1</i> | <i>pct.2</i> | <i>p_val_adj</i> | <i>cluster</i> |
|----------------|--------------|------------------|--------------|--------------|------------------|----------------|
| <i>Pclaf</i>   | 2.94E-24     | 0.975568         | 0.265        | 0.055        | 4.05E-20         | Prolif.        |
| <i>Stmn1</i>   | 1.76E-21     | 0.997927         | 0.327        | 0.112        | 2.43E-17         | Prolif.        |
| <i>Hmgb2</i>   | 8.12E-21     | 0.893222         | 0.626        | 0.467        | 1.12E-16         | Prolif.        |
| <i>Tuba1b</i>  | 5.99E-19     | 0.89569          | 0.417        | 0.204        | 8.27E-15         | Prolif.        |
| <i>Ptma</i>    | 2.50E-15     | 0.417436         | 0.801        | 0.736        | 3.45E-11         | Prolif.        |
| <i>Tubb5</i>   | 2.70E-14     | 0.805226         | 0.44         | 0.279        | 3.73E-10         | Prolif.        |
| <i>H2afz</i>   | 2.45E-13     | 0.604732         | 0.548        | 0.395        | 3.38E-09         | Prolif.        |
| <i>Top2a</i>   | 3.33E-12     | 0.86777          | 0.295        | 0.147        | 4.60E-08         | Prolif.        |
| <i>Tmpo</i>    | 1.35E-08     | 0.472335         | 0.283        | 0.152        | 0.000186         | Prolif.        |
| <i>Hmgb1</i>   | 1.17E-06     | 0.359727         | 0.582        | 0.506        | 0.016121         | Prolif.        |
| <i>Dut</i>     | 1.69E-06     | 0.425657         | 0.371        | 0.259        | 0.023307         | Prolif.        |
| <i>Ran</i>     | 2.16E-06     | 0.404886         | 0.396        | 0.292        | 0.029772         | Prolif.        |
| <i>Dek</i>     | 4.75E-06     | 0.468378         | 0.474        | 0.399        | 0.065538         | Prolif.        |
| <i>Lsm5</i>    | 7.06E-06     | 0.291185         | 0.28         | 0.17         | 0.097349         | Prolif.        |
| <i>Hnrnpab</i> | 5.48E-05     | 0.337543         | 0.351        | 0.259        | 0.755419         | Prolif.        |
| <i>Hnrnpf</i>  | 6.15E-05     | 0.283779         | 0.42         | 0.314        | 0.84884          | Prolif.        |
| <i>Srsf3</i>   | 6.24E-05     | 0.352938         | 0.438        | 0.361        | 0.860969         | Prolif.        |
| <i>Pcna</i>    | 0.000108     | 0.381582         | 0.324        | 0.235        | 1                | Prolif.        |
| <i>H2afv</i>   | 0.000191     | 0.387476         | 0.361        | 0.279        | 1                | Prolif.        |
| <i>Anp32e</i>  | 0.000195     | 0.316612         | 0.319        | 0.229        | 1                | Prolif.        |
| <i>Cox5b</i>   | 0.000196     | 0.274886         | 0.508        | 0.425        | 1                | Prolif.        |
| <i>Cbx3</i>    | 0.000275     | 0.312495         | 0.492        | 0.425        | 1                | Prolif.        |
| <i>Eif5a</i>   | 0.000292     | 0.275632         | 0.379        | 0.29         | 1                | Prolif.        |
| <i>Ssrp1</i>   | 0.000297     | 0.32503          | 0.258        | 0.175        | 1                | Prolif.        |
| <i>Ywhae</i>   | 0.000351     | 0.315901         | 0.341        | 0.253        | 1                | Prolif.        |
| <i>Anp32b</i>  | 0.000368     | 0.346942         | 0.381        | 0.303        | 1                | Prolif.        |
| <i>Tagln2</i>  | 0.000621     | 0.279079         | 0.263        | 0.183        | 1                | Prolif.        |
| <i>Snrpd3</i>  | 0.000666     | 0.271248         | 0.261        | 0.183        | 1                | Prolif.        |
| <i>Smc4</i>    | 0.000835     | 0.380995         | 0.341        | 0.269        | 1                | Prolif.        |
| <i>Lbr</i>     | 0.001371     | 0.276313         | 0.272        | 0.196        | 1                | Prolif.        |
| <i>Ccl5</i>    | 6.68E-65     | 1.357775         | 0.896        | 0.57         | 9.22E-61         | Prog.Exh.      |
| <i>Cxcr6</i>   | 3.87E-25     | 0.675412         | 0.67         | 0.393        | 5.34E-21         | Prog.Exh.      |

|                 |          |          |       |       |          |           |
|-----------------|----------|----------|-------|-------|----------|-----------|
| <i>Rps15a</i>   | 5.37E-21 | 0.300159 | 0.983 | 0.967 | 7.41E-17 | Prog.Exh. |
| <i>Nkg7</i>     | 3.54E-19 | 0.376068 | 0.932 | 0.79  | 4.88E-15 | Prog.Exh. |
| <i>Tmsb4x</i>   | 4.73E-19 | 0.266928 | 0.998 | 0.992 | 6.53E-15 | Prog.Exh. |
| <i>Klrd1</i>    | 3.54E-18 | 0.701792 | 0.575 | 0.361 | 4.88E-14 | Prog.Exh. |
| <i>AW112010</i> | 1.33E-17 | 0.425543 | 0.889 | 0.785 | 1.83E-13 | Prog.Exh. |
| <i>S100a6</i>   | 1.18E-16 | 0.536559 | 0.809 | 0.656 | 1.63E-12 | Prog.Exh. |
| <i>Hcst</i>     | 1.26E-15 | 0.475579 | 0.696 | 0.489 | 1.74E-11 | Prog.Exh. |
| <i>Cd3g</i>     | 4.28E-13 | 0.465221 | 0.66  | 0.497 | 5.90E-09 | Prog.Exh. |
| <i>Cd8b1</i>    | 8.01E-13 | 0.480412 | 0.625 | 0.441 | 1.10E-08 | Prog.Exh. |
| <i>Cd8a</i>     | 1.04E-12 | 0.415754 | 0.71  | 0.547 | 1.43E-08 | Prog.Exh. |
| <i>Gimap3</i>   | 1.55E-11 | 0.505491 | 0.453 | 0.279 | 2.14E-07 | Prog.Exh. |
| <i>Btg1</i>     | 1.97E-11 | 0.34915  | 0.825 | 0.732 | 2.72E-07 | Prog.Exh. |
| <i>Malat1</i>   | 4.32E-10 | 0.2681   | 0.958 | 0.92  | 5.96E-06 | Prog.Exh. |
| <i>Ctla2a</i>   | 4.85E-10 | 0.520598 | 0.333 | 0.183 | 6.70E-06 | Prog.Exh. |
| <i>Vps37b</i>   | 1.70E-09 | 0.515817 | 0.344 | 0.197 | 2.35E-05 | Prog.Exh. |
| <i>Plac8</i>    | 5.93E-09 | 0.614176 | 0.394 | 0.258 | 8.18E-05 | Prog.Exh. |
| <i>Itga4</i>    | 1.35E-08 | 0.430706 | 0.472 | 0.327 | 0.000187 | Prog.Exh. |
| <i>Klre1</i>    | 2.00E-08 | 0.650098 | 0.276 | 0.154 | 0.000276 | Prog.Exh. |
| <i>Selplg</i>   | 2.17E-08 | 0.407705 | 0.531 | 0.392 | 0.000299 | Prog.Exh. |
| <i>Gimap4</i>   | 7.13E-08 | 0.462012 | 0.422 | 0.3   | 0.000983 | Prog.Exh. |
| <i>AU020206</i> | 7.55E-08 | 0.429658 | 0.441 | 0.3   | 0.001041 | Prog.Exh. |
| <i>Ptpn22</i>   | 8.30E-08 | 0.393956 | 0.472 | 0.344 | 0.001145 | Prog.Exh. |
| <i>Id2</i>      | 1.33E-07 | 0.387256 | 0.642 | 0.532 | 0.001831 | Prog.Exh. |
| <i>Chsy1</i>    | 1.43E-07 | 0.459917 | 0.302 | 0.184 | 0.001976 | Prog.Exh. |
| <i>S100a11</i>  | 1.57E-07 | 0.335123 | 0.564 | 0.42  | 0.002165 | Prog.Exh. |
| <i>Sh2d2a</i>   | 3.80E-07 | 0.320381 | 0.597 | 0.477 | 0.00524  | Prog.Exh. |
| <i>Klrc1</i>    | 4.03E-07 | 0.443429 | 0.377 | 0.248 | 0.005564 | Prog.Exh. |
| <i>Ptpn18</i>   | 5.17E-07 | 0.341086 | 0.538 | 0.424 | 0.007138 | Prog.Exh. |
| <i>Xcl1</i>     | 1.93E-81 | 2.651566 | 0.699 | 0.131 | 2.67E-77 | Term.Exh. |
| <i>Crtam</i>    | 2.94E-37 | 1.174578 | 0.264 | 0.024 | 4.05E-33 | Term.Exh. |
| <i>Ccl3</i>     | 2.53E-31 | 1.819576 | 0.554 | 0.215 | 3.50E-27 | Term.Exh. |
| <i>Ccl1</i>     | 1.71E-30 | 1.866678 | 0.29  | 0.045 | 2.36E-26 | Term.Exh. |
| <i>Ccl4</i>     | 2.11E-27 | 1.900704 | 0.658 | 0.414 | 2.92E-23 | Term.Exh. |
| <i>Ifng</i>     | 1.20E-14 | 1.112672 | 0.399 | 0.17  | 1.66E-10 | Term.Exh. |
| <i>Cd160</i>    | 2.80E-14 | 0.677847 | 0.332 | 0.121 | 3.87E-10 | Term.Exh. |

|                 |          |          |       |       |          |           |
|-----------------|----------|----------|-------|-------|----------|-----------|
| <i>Rgs16</i>    | 5.45E-14 | 0.667958 | 0.601 | 0.321 | 7.53E-10 | Term.Exh. |
| <i>Rel</i>      | 6.49E-14 | 0.702648 | 0.306 | 0.104 | 8.95E-10 | Term.Exh. |
| <i>Nrgn</i>     | 1.15E-13 | 0.881117 | 0.497 | 0.267 | 1.58E-09 | Term.Exh. |
| <i>Il21r</i>    | 1.81E-12 | 0.55941  | 0.446 | 0.206 | 2.50E-08 | Term.Exh. |
| <i>Ifi27l2a</i> | 2.47E-11 | 0.670502 | 0.435 | 0.206 | 3.40E-07 | Term.Exh. |
| <i>Ucp2</i>     | 1.35E-09 | 0.49301  | 0.617 | 0.411 | 1.86E-05 | Term.Exh. |
| <i>Cd82</i>     | 1.74E-08 | 0.470351 | 0.435 | 0.235 | 0.000241 | Term.Exh. |
| <i>Nfkbia</i>   | 2.00E-08 | 0.54216  | 0.451 | 0.256 | 0.000276 | Term.Exh. |
| <i>Bcl2a1b</i>  | 2.21E-08 | 0.542361 | 0.451 | 0.262 | 0.000305 | Term.Exh. |
| <i>Tnfrsf9</i>  | 2.37E-08 | 0.551733 | 0.575 | 0.373 | 0.000327 | Term.Exh. |
| <i>Chd4</i>     | 1.12E-07 | 0.426462 | 0.451 | 0.265 | 0.00155  | Term.Exh. |
| <i>Nr4a21</i>   | 1.40E-07 | 0.415281 | 0.596 | 0.398 | 0.001938 | Term.Exh. |
| <i>Nkg71</i>    | 1.58E-07 | 0.286876 | 0.938 | 0.821 | 0.002176 | Term.Exh. |
| <i>Selenos</i>  | 1.94E-07 | 0.378847 | 0.311 | 0.15  | 0.002679 | Term.Exh. |
| <i>Btg3</i>     | 2.88E-07 | 0.456642 | 0.259 | 0.119 | 0.003975 | Term.Exh. |
| <i>Nr4a3</i>    | 3.59E-07 | 0.65156  | 0.285 | 0.141 | 0.004948 | Term.Exh. |
| <i>Kdm2b</i>    | 4.57E-07 | 0.475436 | 0.301 | 0.147 | 0.006303 | Term.Exh. |
| <i>St13</i>     | 9.97E-07 | 0.373932 | 0.394 | 0.229 | 0.013759 | Term.Exh. |
| <i>Nfkb1</i>    | 1.64E-06 | 0.402183 | 0.404 | 0.239 | 0.022663 | Term.Exh. |
| <i>Il18rap</i>  | 3.67E-06 | 0.379423 | 0.264 | 0.132 | 0.050593 | Term.Exh. |
| <i>Rbpj</i>     | 5.90E-06 | 0.30652  | 0.715 | 0.545 | 0.081397 | Term.Exh. |
| <i>Cst7</i>     | 6.17E-06 | 0.28924  | 0.42  | 0.254 | 0.085117 | Term.Exh. |
| <i>Ndfip1</i>   | 6.49E-06 | 0.316361 | 0.658 | 0.504 | 0.089557 | Term.Exh. |
