# Supplementary material for: Combined Autophagy Inhibition and Dendritic Cell Recruitment Induces Antitumor Immunity and Enhances Immune Checkpoint Blockade Sensitivity in Pancreatic Cancer
Source: PubMed Central journal article supplement — Cancer Res. 2024 Sep 17;84(24):4214–32. doi: 10.1158/0008-5472.CAN-24-0830 (PMC11647207; doi:10.1158/0008-5472.can-24-0830), 2024-09-17
Supplement: can-24-0830_table_s9_suppst9.pdf [file can-24-0830_table_s9_suppst9.pdf]

**Table S9. Gene lists and sources for each CD8+ T-cell-associated gene set used in the scRNA-seq analysis of CD45+ immune cells in the KPC1 shNC/shATG7 syngeneic PDAC tumors**

| Effector genes                                       | Proliferation genes    | Exhaustion genes       |
|------------------------------------------------------|------------------------|------------------------|
| Bhatt, D., et al. 2021.<br>Oliveira, G., et al. 2021 | Bhatt, D., et al. 2021 | Bhatt, D., et al. 2021 |
| <i>Il2</i>                                           | <i>E2f1</i>            | <i>Tigit</i>           |
| <i>Fasl</i>                                          | <i>Cdc6</i>            | <i>Pdcd1</i>           |
| <i>Tnf</i>                                           | <i>Mki67</i>           | <i>Lag3</i>            |
| <i>Tnfsf10</i>                                       |                        | <i>Havcr2</i>          |
| <i>Prf1</i>                                          |                        |                        |
| <i>Gzmb</i>                                          |                        |                        |
| <i>Gzma</i>                                          |                        |                        |
| <i>Il10</i>                                          |                        |                        |
| <i>Ifng</i>                                          |                        |                        |
